# Supplementary material for: Synthesis of [B,Al]-EWT-Type Zeolite and Its Catalytic Properties
Source: MDPI journal article supplement (doi:10.3390/molecules27175625), 2022-08-31
Supplement: s1 [file s1]

## Supporting Information

Table S1. The catalytic performance of zeolites by standard curve method.

| Samples                                         | HZSM-5 | HBeta  | EWT     | U-60-08-1<br>0 | U-60-08-7.<br>3 | U-90-08-1<br>0 | U-90-08-7.<br>3 | U-90-08-10-HC<br>1 |
|-------------------------------------------------|--------|--------|---------|----------------|-----------------|----------------|-----------------|--------------------|
| $n(\text{SiO}_2)/n(\text{Al}_2\text{O}_3)$      | 49     | 20     | 92      | 42             | 44              | 41             | 45              | 65.5               |
| total mass of sample after rotary evaporation/g | 57.39  | 29.831 | 46.50   | 30.11          | 30.23           | 31.28          | 29.88           | 27.65              |
| GC peak area of PA                              | 8096.5 | 6223.4 | 10546.7 | 8547.5         | 8793.6          | 5807.3         | 7090.9          | 5591.7             |
| cyclohexanone addition amount/g                 | 19.67  | 19.67  | 19.67   | 19.67          | 19.67           | 19.67          | 19.67           | 19.67              |
| mass of remaining cyclohexanone/g               | 6.519  | 2.733  | 6.619   | 3.579          | 3.680           | 2.713          | 3.041           | 2.328              |
| cyclohexanone conversion/%                      | 66.86  | 86.11  | 66.35   | 81.80          | 81.29           | 86.21          | 84.54           | 88.17              |
| Peak area percentage of PA/%                    | 7.770  | 8.072  | 7.180   | 7.856          | 8.531           | 7.462          | 6.682           | 7.750              |
| Peak area percentage of PB/%                    | 0.277  | 0.155  | 0.385   | 0.201          | 0.013           | 0.181          | 0.156           | 0.129              |
| Selectivity of PA/%                             | 96.56  | 98.12  | 94.91   | 97.51          | 99.85           | 97.63          | 97.78           | 98.36              |

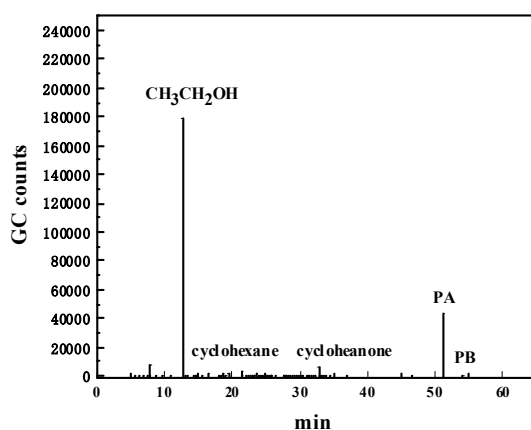

Figure S1. The GC analysis result of product.

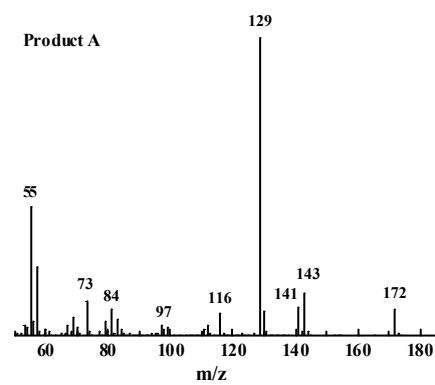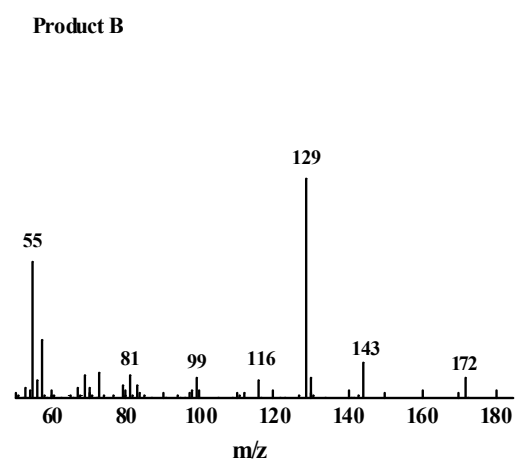

Figure S2. The GC-MS spectra of products A and B.

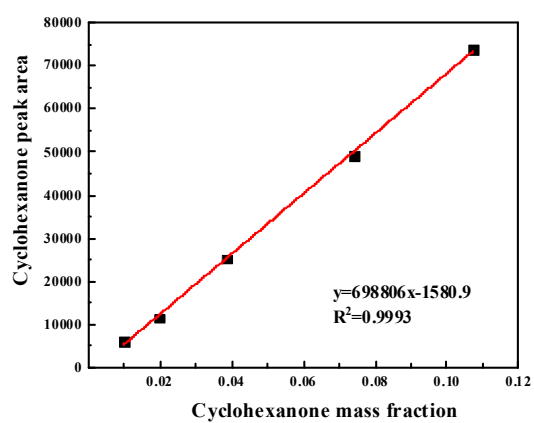

Figure S3. The standard curve method.
